# Supplementary material for: A Randomized Phase II Trial of Pioglitazone for Lung Cancer Chemoprevention in High-Risk Current and Former Smokers
Source: Oxford University Press journal article supplement (doi:10.1158/1940-6207.capr-19-0006), 2019-07-15
Supplement: 19406207capr190006-sup-214617_2_supp_5602998_ptkwlp.docx [file 19406207capr190006-sup-214617_2_supp_5602998_ptkwlp.docx]

| *Group* | *Biopsies Analyzed* | *Endpoint* | *Treatment Effect* | *95% CI* | *SE* | *DF* | *t Statistic* | *P-Value* |
| --- | --- | --- | --- | --- | --- | --- | --- | --- |
|  |  |  |  |  |  |  |  |  |
| Former | BL Non-Normal Pairs | Maximum | -0.40 | (-1.68, 0.89) | 0.63 | 26 | -0.63 | 0.534 |
| Smokers |  | Mean | -0.26 | (-1.50, 0.97) | 0.60 | 26 | -0.44 | 0.664 |
|  |  | Dysplasia Idx | -0.09 | (-0.36, 0.17) | 0.13 | 26 | -0.71 | 0.484 |
|  | Matched Pairs | Maximum | -0.18 | (-1.39, 1.03) | 0.60 | 35 | -0.30 | 0.768 |
|  |  | Mean | -0.24 | (-0.81, 0.34) | 0.28 | 35 | -0.83 | 0.413 |
|  |  | Dysplasia Idx | -0.05 | (-0.18, 0.08) | 0.06 | 35 | -0.82 | 0.415 |
|  | Reference Sites | Maximum | -0.21 | (-1.43, 1.01) | 0.60 | 35 | -0.35 | 0.729 |
|  |  | Mean | -0.31 | (-0.89, 0.27) | 0.29 | 35 | -1.08 | 0.287 |
|  |  | Dysplasia Idx | -0.08 | (-0.21, 0.06) | 0.07 | 35 | -1.15 | 0.258 |
|  | All Biopsies | Maximum | -0.19 | (-1.40, 1.02) | 0.60 | 35 | -0.31 | 0.756 |
|  |  | Mean | -0.24 | (-0.82, 0.33) | 0.28 | 35 | -0.87 | 0.393 |
|  |  | Dysplasia Idx | -0.06 | (-0.19, 0.07) | 0.06 | 35 | -0.90 | 0.374 |
|  |  |  |  |  |  |  |  |  |
| Current | BL Non-Normal Pairs | Maximum | 0.32 | (-0.69, 1.34) | 0.50 | 32 | 0.65 | 0.523 |
| Smokers |  | Mean | -0.05 | (-0.72, 0.63) | 0.33 | 32 | -0.14 | 0.890 |
|  |  | Dysplasia Idx | 0.01 | (-0.17, 0.19) | 0.09 | 32 | 0.10 | 0.925 |
|  | Matched Pairs | Maximum | -0.01 | (-0.94, 0.92) | 0.46 | 35 | -0.02 | 0.984 |
|  |  | Mean | -0.11 | (-0.58, 0.35) | 0.23 | 35 | -0.49 | 0.626 |
|  |  | Dysplasia Idx | -0.01 | (-0.13, 0.12) | 0.06 | 35 | -0.09 | 0.926 |
|  | Reference Sites | Maximum | -0.14 | (-1.18, 0.89) | 0.51 | 35 | -0.28 | 0.782 |
|  |  | Mean | -0.09 | (-0.55, 0.36) | 0.22 | 35 | -0.41 | 0.685 |
|  |  | Dysplasia Idx | 0.01 | (-0.12, 0.14) | 0.06 | 35 | 0.13 | 0.897 |
|  | All Biopsies | Maximum | -0.06 | (-0.99, 0.86) | 0.46 | 35 | -0.14 | 0.892 |
|  |  | Mean | -0.09 | (-0.56, 0.38) | 0.23 | 35 | -0.39 | 0.698 |
|  |  | Dysplasia Idx | -0.01 | (-0.14, 0.12) | 0.06 | 35 | -0.21 | 0.833 |
|  |  |  |  |  |  |  |  |  |
| All | BL Non-Normal Pairs | Maximum | 0.00 | (-0.79, 0.79) | 0.40 | 60 | 0.00 | 1.000 |
| Subjects |  | Mean | -0.14 | (-0.79, 0.52) | 0.33 | 60 | -0.42 | 0.676 |
|  |  | Dysplasia Idx | -0.04 | (-0.19, 0.11) | 0.08 | 60 | -0.49 | 0.626 |
|  | Matched Pairs | Maximum | -0.09 | (-0.84, 0.66) | 0.38 | 72 | -0.24 | 0.810 |
|  |  | Mean | -0.16 | (-0.53, 0.20) | 0.18 | 72 | -0.88 | 0.382 |
|  |  | Dysplasia Idx | -0.03 | (-0.12, 0.06) | 0.05 | 72 | -0.63 | 0.532 |
|  | Reference Sites | Maximum | -0.18 | (-0.97, 0.61) | 0.39 | 72 | -0.46 | 0.649 |
|  |  | Mean | -0.20 | (-0.57, 0.18) | 0.19 | 72 | -1.05 | 0.297 |
|  |  | Dysplasia Idx | -0.03 | (-0.12, 0.06) | 0.05 | 72 | -0.71 | 0.478 |
|  | All Biopsies | Maximum | -0.13 | (-0.88, 0.62) | 0.37 | 72 | -0.35 | 0.725 |
|  |  | Mean | -0.15 | (-0.52, 0.22) | 0.18 | 72 | -0.83 | 0.412 |
|  |  | Dysplasia Idx | -0.03 | (-0.12, 0.06) | 0.05 | 72 | -0.77 | 0.446 |
|  |  |  |  |  |  |  |  |  |
