# Supplementary material for: A Randomized Phase II Trial of Pioglitazone for Lung Cancer Chemoprevention in High-Risk Current and Former Smokers
Source: Oxford University Press journal article supplement (doi:10.1158/1940-6207.capr-19-0006), 2019-07-15
Supplement: 19406207capr190006-sup-214617_2_supp_5603010_ptkwr5.docx [file 19406207capr190006-sup-214617_2_supp_5603010_ptkwr5.docx]

|  | Total with AE |  | Pioglitazone | |  | Placebo | |  | Fisher’s Exact P-Value |
| --- | --- | --- | --- | --- | --- | --- | --- | --- | --- |
| CTCAE Term |  | N | % |  | N | % |  |
| Hypophosphatemia | 50 |  | 22 | 47% |  | 28 | 62% |  | 0.150 |
| Hypertension | 46 |  | 24 | 51% |  | 22 | 49% |  | 1.000 |
| Weight Gain | 31 |  | 20 | 43% |  | 11 | 24% |  | 0.080 |
| Hypocalcemia | 22 |  | 13 | 28% |  | 9 | 20% |  | 0.467 |
| Anemia | 20 |  | 11 | 23% |  | 9 | 20% |  | 0.802 |
| Aspartate Aminotransferase Increased | 19 |  | 11 | 23% |  | 8 | 18% |  | 0.609 |
| Edema Limbs | 18 |  | 6 | 13% |  | 12 | 27% |  | 0.118 |
| Hyperglycemia | 16 |  | 4 | 9% |  | 12 | 27% |  | 0.028 |
| Hypoglycemia | 11 |  | 8 | 17% |  | 3 | 7% |  | 0.199 |
| Bronchial Infection | 11 |  | 7 | 15% |  | 4 | 9% |  | 0.524 |
| Ggt Increased | 11 |  | 4 | 9% |  | 7 | 16% |  | 0.349 |
| Alanine Aminotransferase Increased | 10 |  | 6 | 13% |  | 4 | 9% |  | 0.740 |
| Cough | 10 |  | 5 | 11% |  | 5 | 11% |  | 1.000 |
| White Blood Cell Decreased | 9 |  | 6 | 13% |  | 3 | 7% |  | 0.486 |
| Productive Cough | 9 |  | 5 | 11% |  | 4 | 9% |  | 1.000 |
| Sinus Tachycardia | 9 |  | 5 | 11% |  | 4 | 9% |  | 1.000 |
| Localized Edema | 8 |  | 3 | 6% |  | 5 | 11% |  | 0.481 |
| Creatinine Increased | 7 |  | 6 | 13% |  | 1 | 2% |  | 0.111 |
| Sinus Bradycardia | 7 |  | 5 | 11% |  | 2 | 4% |  | 0.435 |
| Hypokalemia | 7 |  | 2 | 4% |  | 5 | 11% |  | 0.262 |
| Non-Cardiac Chest Pain | 6 |  | 4 | 9% |  | 2 | 4% |  | 0.677 |
| Sore Throat | 6 |  | 4 | 9% |  | 2 | 4% |  | 0.677 |
| Dyspnea | 6 |  | 2 | 4% |  | 4 | 9% |  | 0.430 |
| Fever | 6 |  | 2 | 4% |  | 4 | 9% |  | 0.430 |
| Platelet Count Decreased | 6 |  | 2 | 4% |  | 4 | 9% |  | 0.430 |
| Vomiting | 5 |  | 3 | 6% |  | 2 | 4% |  | 1.000 |
| Wheezing | 5 |  | 3 | 6% |  | 2 | 4% |  | 1.000 |
| Alkaline Phosphatase Increased | 5 |  | 2 | 4% |  | 3 | 7% |  | 0.674 |
| Fatigue | 5 |  | 2 | 4% |  | 3 | 7% |  | 0.674 |
| Dizziness | 4 |  | 4 | 9% |  | 0 | 0% |  | 0.117 |
| Allergic Rhinitis | 4 |  | 3 | 6% |  | 1 | 2% |  | 0.617 |
| Myalgia | 4 |  | 3 | 6% |  | 1 | 2% |  | 0.617 |
| Chills | 4 |  | 2 | 4% |  | 2 | 4% |  | 1.000 |
| Hyponatremia | 4 |  | 2 | 4% |  | 2 | 4% |  | 1.000 |
| Upper Respiratory Infection | 4 |  | 2 | 4% |  | 2 | 4% |  | 1.000 |
| Hypoalbuminemia | 4 |  | 1 | 2% |  | 3 | 7% |  | 0.356 |
| Hyperkalemia | 3 |  | 3 | 6% |  | 0 | 0% |  | 0.242 |
| Abdominal Pain | 3 |  | 2 | 4% |  | 1 | 2% |  | 1.000 |
| Blood Bilirubin Increased | 3 |  | 2 | 4% |  | 1 | 2% |  | 1.000 |
| Diarrhea | 3 |  | 2 | 4% |  | 1 | 2% |  | 1.000 |
| Pain | 3 |  | 2 | 4% |  | 1 | 2% |  | 1.000 |
| Fracture | 3 |  | 1 | 2% |  | 2 | 4% |  | 0.613 |
| Nausea | 3 |  | 1 | 2% |  | 2 | 4% |  | 0.613 |
| Somnolence | 3 |  | 1 | 2% |  | 2 | 4% |  | 0.613 |
| Anxiety | 2 |  | 2 | 4% |  | 0 | 0% |  | 0.495 |
| Suicidal Ideation | 2 |  | 2 | 4% |  | 0 | 0% |  | 0.495 |
| Urinary Frequency | 2 |  | 2 | 4% |  | 0 | 0% |  | 0.495 |
| Ventricular Arrhythmia | 2 |  | 2 | 4% |  | 0 | 0% |  | 0.495 |
| Atrial Fibrillation | 2 |  | 1 | 2% |  | 1 | 2% |  | 1.000 |
| Chest Wall Pain | 2 |  | 1 | 2% |  | 1 | 2% |  | 1.000 |
| Hemoglobin Increased | 2 |  | 1 | 2% |  | 1 | 2% |  | 1.000 |
| Hoarseness | 2 |  | 1 | 2% |  | 1 | 2% |  | 1.000 |
| Neutrophil Count Decreased | 2 |  | 1 | 2% |  | 1 | 2% |  | 1.000 |
| Pruritus | 2 |  | 1 | 2% |  | 1 | 2% |  | 1.000 |
| Skin Infection | 2 |  | 1 | 2% |  | 1 | 2% |  | 1.000 |
| Electrocardiogram Qt Corrected Interval Prolonged | 2 |  | 0 | 0% |  | 2 | 4% |  | 0.237 |
| Headache | 2 |  | 0 | 0% |  | 2 | 4% |  | 0.237 |
| Pneumonitis | 2 |  | 0 | 0% |  | 2 | 4% |  | 0.237 |
| Weight Loss | 2 |  | 0 | 0% |  | 2 | 4% |  | 0.237 |
| Alcohol Intolerance | 1 |  | 1 | 2% |  | 0 | 0% |  | 1.000 |
| Ankle Fracture | 1 |  | 1 | 2% |  | 0 | 0% |  | 1.000 |
| Anorgasmia | 1 |  | 1 | 2% |  | 0 | 0% |  | 1.000 |
| Back Pain | 1 |  | 1 | 2% |  | 0 | 0% |  | 1.000 |
| Bloating | 1 |  | 1 | 2% |  | 0 | 0% |  | 1.000 |
| Depression | 1 |  | 1 | 2% |  | 0 | 0% |  | 1.000 |
| Fall | 1 |  | 1 | 2% |  | 0 | 0% |  | 1.000 |
| Flu Like Symptoms | 1 |  | 1 | 2% |  | 0 | 0% |  | 1.000 |
| Investigations - Other, Specify | 1 |  | 1 | 2% |  | 0 | 0% |  | 1.000 |
| Pneumothorax | 1 |  | 1 | 2% |  | 0 | 0% |  | 1.000 |
| Respiratory, Thoracic And Mediastinal Disorders - Other, Specify | 1 |  | 1 | 2% |  | 0 | 0% |  | 1.000 |
| Urinary Incontinence | 1 |  | 1 | 2% |  | 0 | 0% |  | 1.000 |
| Arthritis | 1 |  | 0 | 0% |  | 1 | 2% |  | 0.489 |
| Bronchial Stricture | 1 |  | 0 | 0% |  | 1 | 2% |  | 0.489 |
| Bruising | 1 |  | 0 | 0% |  | 1 | 2% |  | 0.489 |
| Confusion | 1 |  | 0 | 0% |  | 1 | 2% |  | 0.489 |
| Electrocardiogram Interval Prolonged | 1 |  | 0 | 0% |  | 1 | 2% |  | 0.489 |
| Heart Failure | 1 |  | 0 | 0% |  | 1 | 2% |  | 0.489 |
| Hematuria | 1 |  | 0 | 0% |  | 1 | 2% |  | 0.489 |
| Hypernatremia | 1 |  | 0 | 0% |  | 1 | 2% |  | 0.489 |
| Hypotension | 1 |  | 0 | 0% |  | 1 | 2% |  | 0.489 |
| Hypoxia | 1 |  | 0 | 0% |  | 1 | 2% |  | 0.489 |
| Laryngeal Inflammation | 1 |  | 0 | 0% |  | 1 | 2% |  | 0.489 |
| Lung Infection | 1 |  | 0 | 0% |  | 1 | 2% |  | 0.489 |
| Lymphocyte Count Decreased | 1 |  | 0 | 0% |  | 1 | 2% |  | 0.489 |
| Nail Infection | 1 |  | 0 | 0% |  | 1 | 2% |  | 0.489 |
| Pleuritic Pain | 1 |  | 0 | 0% |  | 1 | 2% |  | 0.489 |
| Postnasal Drip | 1 |  | 0 | 0% |  | 1 | 2% |  | 0.489 |
| Presyncope | 1 |  | 0 | 0% |  | 1 | 2% |  | 0.489 |
| Pulmonary Fibrosis | 1 |  | 0 | 0% |  | 1 | 2% |  | 0.489 |
| Pulmonary Hypertension | 1 |  | 0 | 0% |  | 1 | 2% |  | 0.489 |
| Sinusitis | 1 |  | 0 | 0% |  | 1 | 2% |  | 0.489 |
| Sneezing | 1 |  | 0 | 0% |  | 1 | 2% |  | 0.489 |
| Syncope | 1 |  | 0 | 0% |  | 1 | 2% |  | 0.489 |
