# Supplementary material for: A Randomized Phase II Trial of Pioglitazone for Lung Cancer Chemoprevention in High-Risk Current and Former Smokers
Source: Oxford University Press journal article supplement (doi:10.1158/1940-6207.capr-19-0006), 2019-07-15
Supplement: 19406207capr190006-sup-214617_2_supp_5633390_p1c81s.docx [file 19406207capr190006-sup-214617_2_supp_5633390_p1c81s.docx]

Supplementary Tables:

**Table 1S: Primary Biopsy analysis**

**Table 2S: Adverse Events by Study Group and Frequency**
